# Supplementary material for: Influence of haem environment on the catalytic properties of the tetrathionate reductase TsdA from Campylobacter jejuni
Source: Oxford University Press journal article supplement (doi:10.1042/bsr20160457), 2016-10-28
Supplement: bsr036e422add.pdf [file bsr036e422add.pdf]

## SUPPLEMENTARY INFORMATION

### Influence of heme environment on the catalytic properties of the tetrathionate reductase TsdA from *Campylobacter jejuni*

Julia M. Kurth<sup>†1</sup>, Julea N. Butt<sup>#</sup>, David J. Kelly<sup>§2</sup> and Christiane Dahl<sup>†3</sup>

From the <sup>†</sup>Institut für Mikrobiologie & Biotechnologie, Rheinische Friedrich Wilhelms Universität Bonn, D-53115 Bonn, Germany, <sup>§</sup>Department of Molecular Biology and Biotechnology, The University of Sheffield, Firth Court, Western Bank, Sheffield S10 2TN, UK, <sup>#</sup>Centre for Molecular and Structural Biochemistry, School of Chemistry, and School of Biological Sciences, University of East Anglia, Norwich Research Park, Norwich NR4 7TJ, United Kingdom

\* Authors for correspondence: <sup>2</sup>David J. Kelly: E-mail [d.kelly@sheffield.ac.uk](mailto:d.kelly@sheffield.ac.uk). Phone +44-114-222-4414 or <sup>3</sup>Christiane Dahl: E-mail [ChDahl@uni-bonn.de](mailto:ChDahl@uni-bonn.de). Phone +49-228-732119. Fax +49-228-747576.

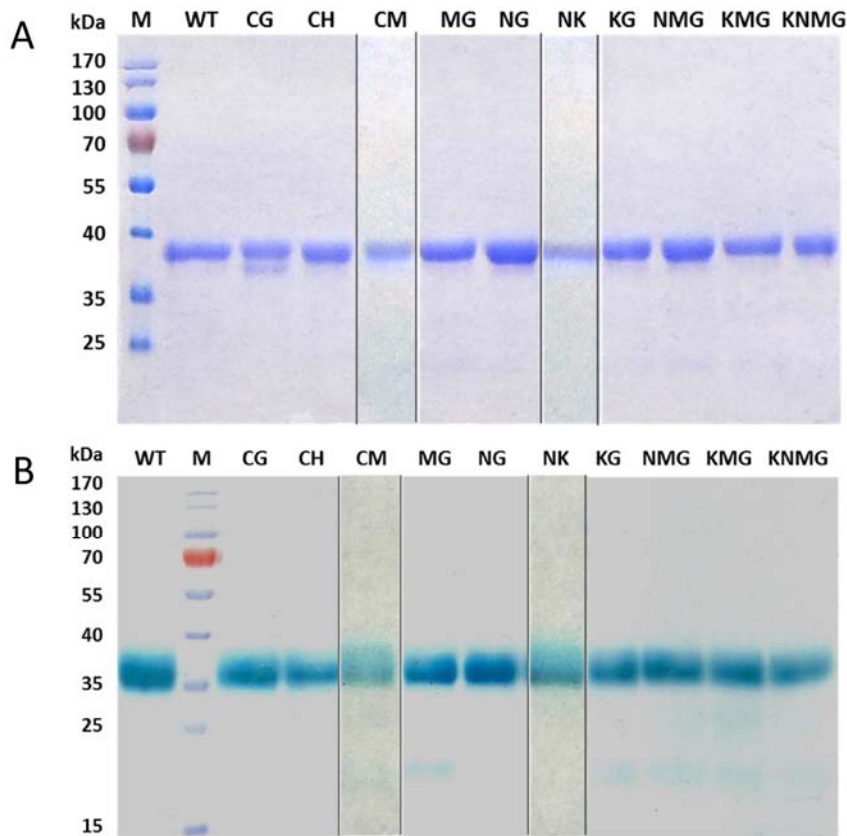

**SI Fig. 1.** Coomassie blue and heme staining of SDS gels with TsdA wt and variant proteins. Pure, recombinant TsdA wt and mutated proteins (C138G, C138H, C138M, M255G, N254G, N254K, K252G, NMG, KMG, KNMG) were used for SDS-PAGE and loaded on a 12.5 % gel. 5 µg protein per lane were used for Coomassie blue staining and 3 µg for heme staining.
